# Supplementary material for: Protein-Binding RNA Aptamers Affect Molecular Interactions Distantly from Their Binding Sites
Source: PubMed Central journal article supplement (PMC4368798; doi:10.1371/journal.pone.0119207), 2015-03-20
Supplement: pone.0119207.s001.pdf [file pone.0119207.s001.pdf]

---

| Aptamer      | Aptamer sequence                                                                  |
|--------------|-----------------------------------------------------------------------------------|
| Upanap-12    | GGGGCCACCAACGACAUUUGCGACUGUUUAUAAACCUAACAGCGACGUAAAGAUAGUUGAUUAAAAUAGUGCCCAUGGAUC |
| Upanap-126   | GGGGCCACCAACGACAUUCAUUCGCACGCUGUGUGGGGAUUAGUCCCGAUGUUGUUGAUUAAAAUAGUGCCCAUGGAUC   |
| Control RNA  | GGGGCCACCAACGACAUUAACUCACGUUGCAACUAAUACGCUGAGUGGAAACCGUUGAUUAAAAUAGUGCCCAUGGAUC   |
| Upanap-12.49 | GGACGACAUUUGCGACUGUUUAUAAACCUAACAGCGACGUAAAGAUAGUCC                               |
| Upanap-12.33 | GGUGCGACUGUUUAUAAACCUAACAGCGACGUACC                                               |

---
